# Supplementary material
Source: publisher figshare collection journal article supplement (https://frontiersin.figshare.com/ndownloader/files/12524078)
Supplement: Supplementary file [file 12524078]

**Table 1. Grouping of duckweed ecotypes g, k, m, n, based on General Linear Model Multivariate analysis of individual substances content in wax**

| #  | Substance             | GLM Multivariate tests<br>significance of effects of<br>duckweed ecotypes on<br>individual substance<br>content in <u>wax</u> | GLM Post Hoc Tukey HSD multiple comparison<br>grouping |                      |          |          |
|----|-----------------------|-------------------------------------------------------------------------------------------------------------------------------|--------------------------------------------------------|----------------------|----------|----------|
|    |                       |                                                                                                                               | number of<br>subsets of<br>ecotypes                    | Homogeneous Subsets: |          |          |
|    |                       |                                                                                                                               |                                                        | Subset 1             | Subset 2 | Subset 3 |
| 1  | C16:0 FA              | 0.0000                                                                                                                        | 3                                                      | g                    | k        | m, n     |
| 2  | C18:2 FA              | 0.0349                                                                                                                        | 1                                                      | g, k, m, n           |          |          |
| 3  | C18:3 FA              | 0.0007                                                                                                                        | 3                                                      | g, m                 | k, m     | k, n     |
| 4  | C18:0 FA              | 0.0004                                                                                                                        | 2                                                      | g, k, m              | n        |          |
| 5  | C22:0 FA              | 0.1089                                                                                                                        | 1                                                      | g, k, m, n           |          |          |
| 6  | C24:0 FA              | 0.0688                                                                                                                        | 1                                                      | g, k, m, n           |          |          |
| 7  | C19:0 OL              | 0.0045                                                                                                                        | 2                                                      | g, k, m              | g, n     |          |
| 8  | C22:0 OL              | 0.0000                                                                                                                        | 2                                                      | g, m                 | k, n     |          |
| 9  | C24:0 OL              | 0.0000                                                                                                                        | 3                                                      | g                    | k, m     | m, n     |
| 10 | C26:0 OL              | 0.0001                                                                                                                        | 3                                                      | g                    | k, m     | m, n     |
| 11 | C27:0 ALK             | 0.1137                                                                                                                        | 1                                                      | g, k, m, n           |          |          |
| 12 | C29:0 ALK             | 0.1457                                                                                                                        | 1                                                      | g, k, m, n           |          |          |
| 13 | unknown ester         | 0.0048                                                                                                                        | 2                                                      | g, k, m              | g, n     |          |
| 14 | hexadecylate          | 0.0467                                                                                                                        | 1                                                      | g, k, m, n           |          |          |
| 15 | glyceryl monostearate | 0.2913                                                                                                                        | 1                                                      | g, k, m, n           |          |          |
| 16 | Campesterol           | 0.0346                                                                                                                        | 2                                                      | g, m, n              | k, m, n  |          |
| 17 | Stigmasterol          | 0.0005                                                                                                                        | 2                                                      | g                    | k, m, n  |          |
| 18 | $\beta$ -sitosterol   | 0.0000                                                                                                                        | 2                                                      | g, k, m              | n        |          |
| 19 | squalene              | 0.0001                                                                                                                        | 2                                                      | g                    | k, m, n  |          |
